# Supplementary material for: Simultaneous speciation of arsenic and mercury in fish by high-performance liquid chromatography inductively coupled plasma mass spectrometry
Source: Royal Society of Chemistry journal article supplement (doi:10.1039/d0ja00523a), 2021-01-01
Supplement: d0ja00523a1.pdf [file d0ja00523a1.pdf]

Supplementary Information

**Simultaneous speciation of arsenic and mercury in fish by high-performance liquid chromatography inductively coupled plasma mass spectrometry**

Yung-Chun Chen<sup>a</sup> and Shiuh-Jen Jiang<sup>a,b,\*</sup>

<sup>a</sup> *Department of Chemistry, National Sun Yat-sen University, Kaohsiung 80424, Taiwan*

<sup>b</sup> *Department of Medical Laboratory Science and Biotechnology, Kaohsiung Medical University, Kaohsiung 80708, Taiwan*

\* Corresponding author. Fax: 886-7-5253908; E-mail: [sjjiang@faculty.nsysu.edu.tw](mailto:sjjiang@faculty.nsysu.edu.tw)

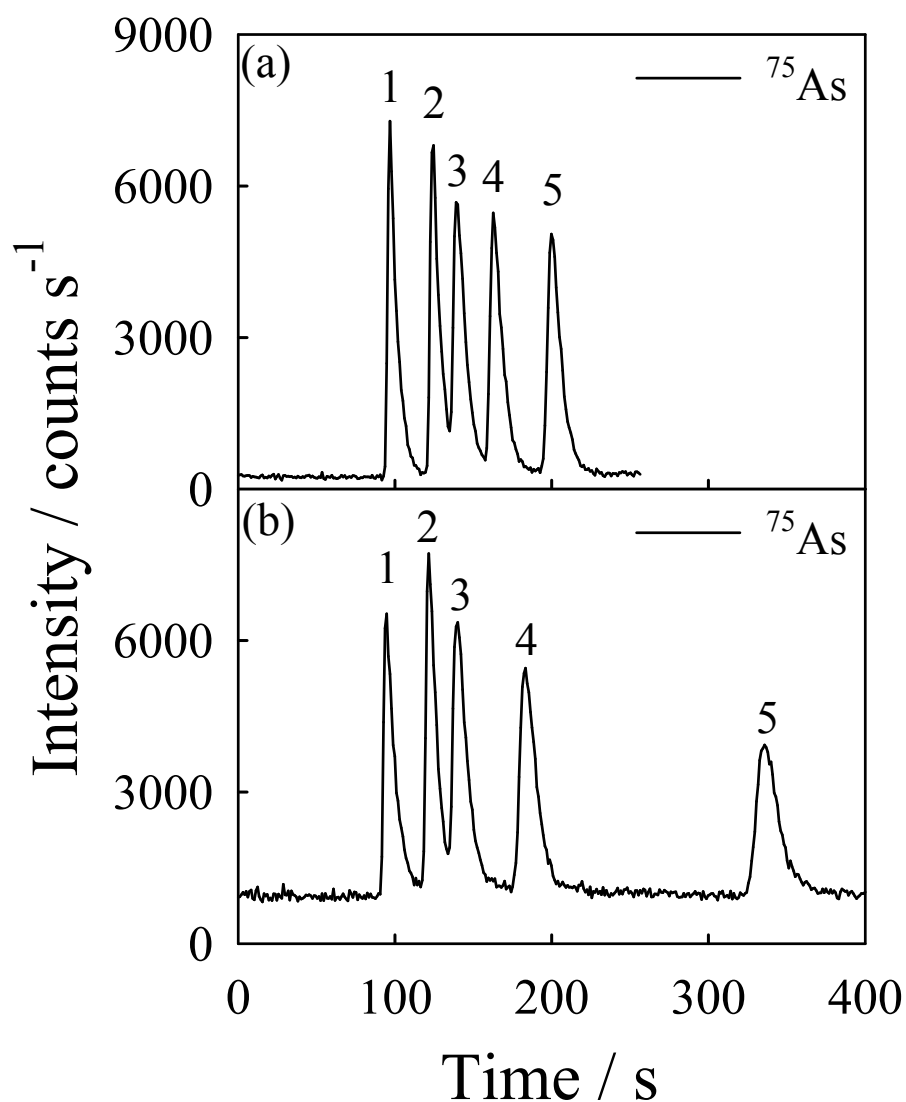

**Fig. S1** Effect of the type of ion pairing reagent on chromatogram: (a) sodium 1-octanesulfonate and (b) sodium 1-decanesulfonate. Mobile phase contained 5 mmol L<sup>-1</sup> of various ion pairing reagent, 5 mmol L<sup>-1</sup> acetate buffer, 0.5% (v/v) ACN and 0.5% (v/v) IPA at pH 4.0. Mobile phase flow rate was 1.2 mL min<sup>-1</sup>. Injected solution contained 5 ng mL<sup>-1</sup> of each of the As species studied. Peak assignment: 1, As(V); 2, MMA; 3, As(III); 4, DMA; 5, AsB.

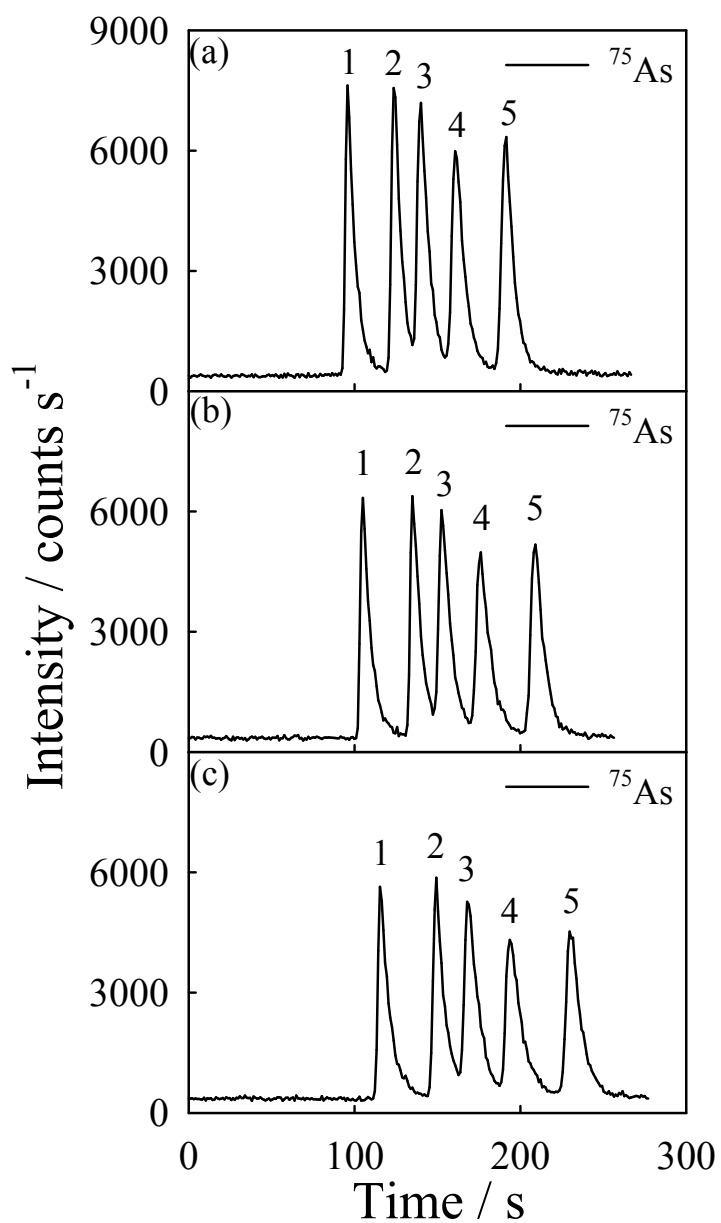

**Fig. S2** Effect of mobile phase flow rate on chromatogram: (a) 1.2, (b) 1.1 and (c) 1.0 mLmin<sup>-1</sup>. Mobile phase contains 5 mmol L<sup>-1</sup> acetate buffer, 5 mmol L<sup>-1</sup> sodium 1-octanesulfonate and 1% (v/v) IPA at pH 4.0. Injected solution contained 5 ng As mL<sup>-1</sup> of each of the As species studied. For peak assignment, see Fig. S1.

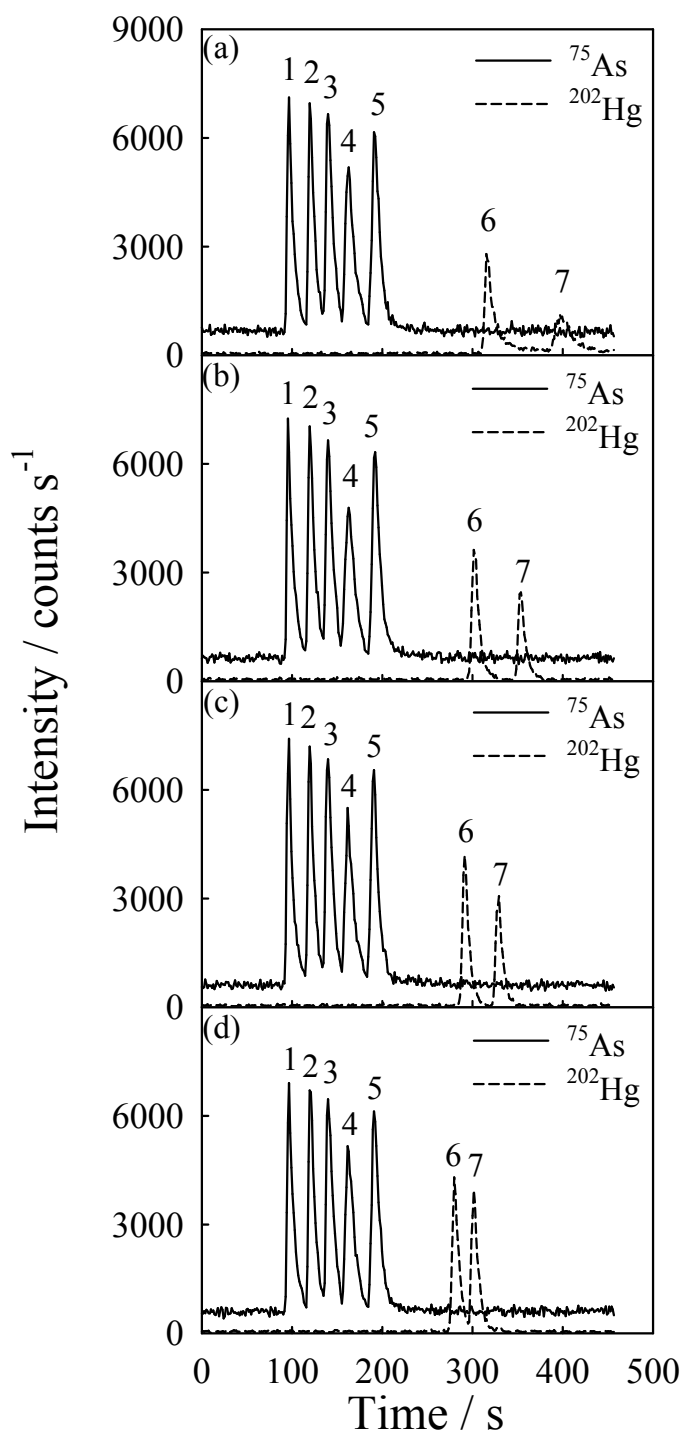

**Fig. S3** Effect of the concentration of L-cysteine in mobile phase B on separation (a) 0.5, (b) 1, (c) 2 and (d) 3 mmol L<sup>-1</sup>. Mobile phase A contained 5 mmol L<sup>-1</sup> sodium 1-octanesulfonate, 5 mmol L<sup>-1</sup> acetate buffer, and 1% (v/v) IPA at pH 4. Mobile phase B contained various concentration of L-cysteine in 1% (v/v) IPA (pH 4). Mobile phase flow rate was 1.2 mL min<sup>-1</sup>. Injected solution contained 5 ng mL<sup>-1</sup> each of As standards and 10 ng mL<sup>-1</sup> each of Hg standards. For peak assignment, see Fig. 2.

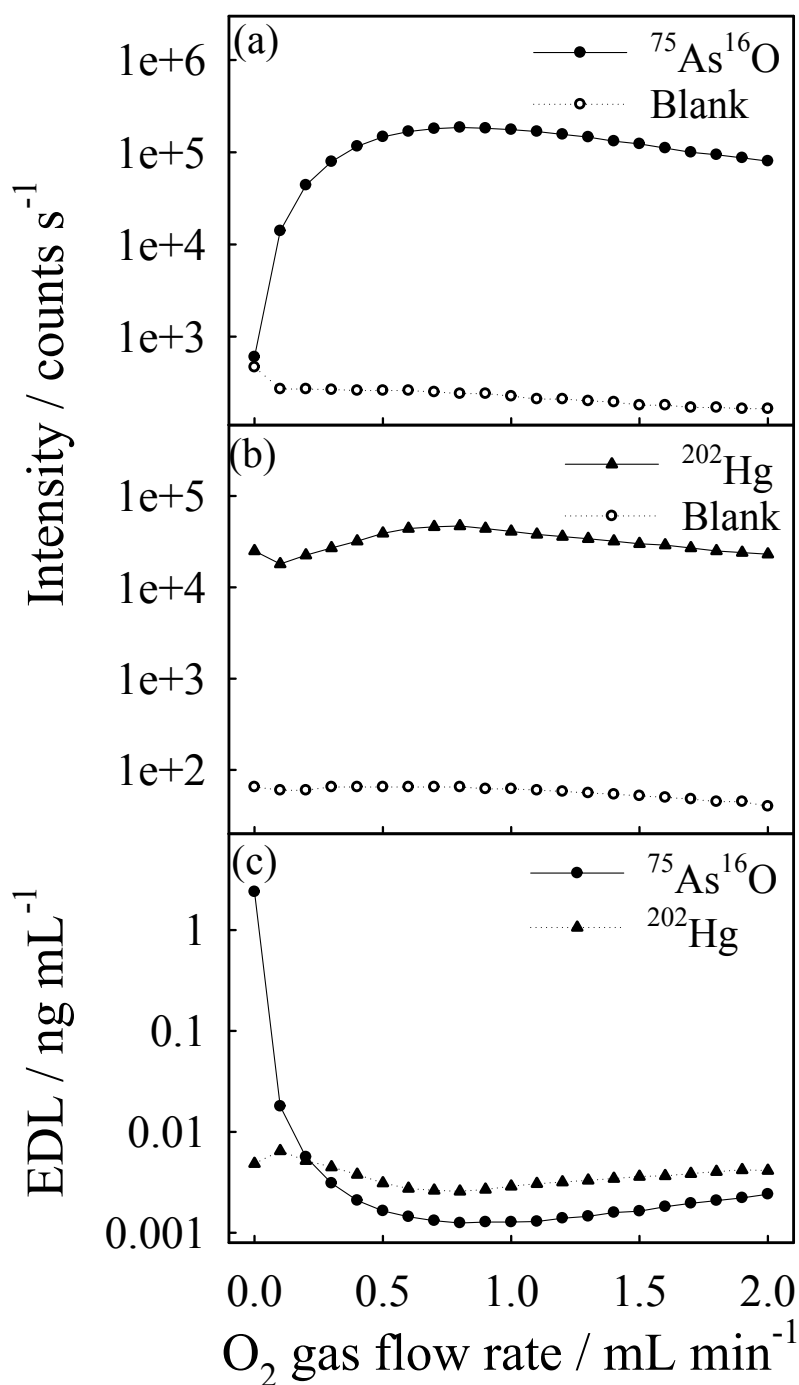

**Fig. S4** Effect of flow rate of O<sub>2</sub> reaction gas on (a) the ion signals of <sup>75</sup>As<sup>16</sup>O<sup>+</sup> and the blank at m/z 91, (b) the ion signals of <sup>202</sup>Hg<sup>+</sup> and the blank and (b) the EDL of <sup>75</sup>As<sup>16</sup>O<sup>+</sup> and <sup>202</sup>Hg<sup>+</sup>. Concentration of As and Hg was 5 ng mL<sup>-1</sup>. Blank: mobile phase. Rejection parameters:  $q = 0.4$ ;  $a = 0.0$ ..

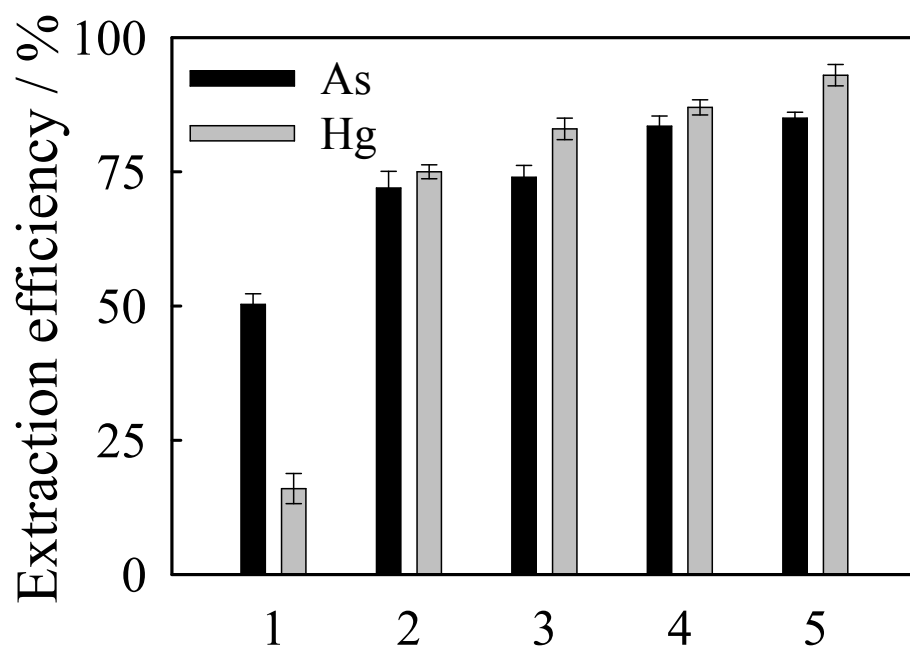

**Fig. S5** Effect of extraction solution on extraction efficiency; (1) H<sub>2</sub>O, (2) 1% (v/v) HNO<sub>3</sub>, (3) 1% (v/v) HCl, (4) mixture of 1% (v/v) HNO<sub>3</sub> and 0.1% (m/v) Protease XIV, and (5) mixture of 1% (v/v) HCl and 0.1% (m/v) Protease XIV.

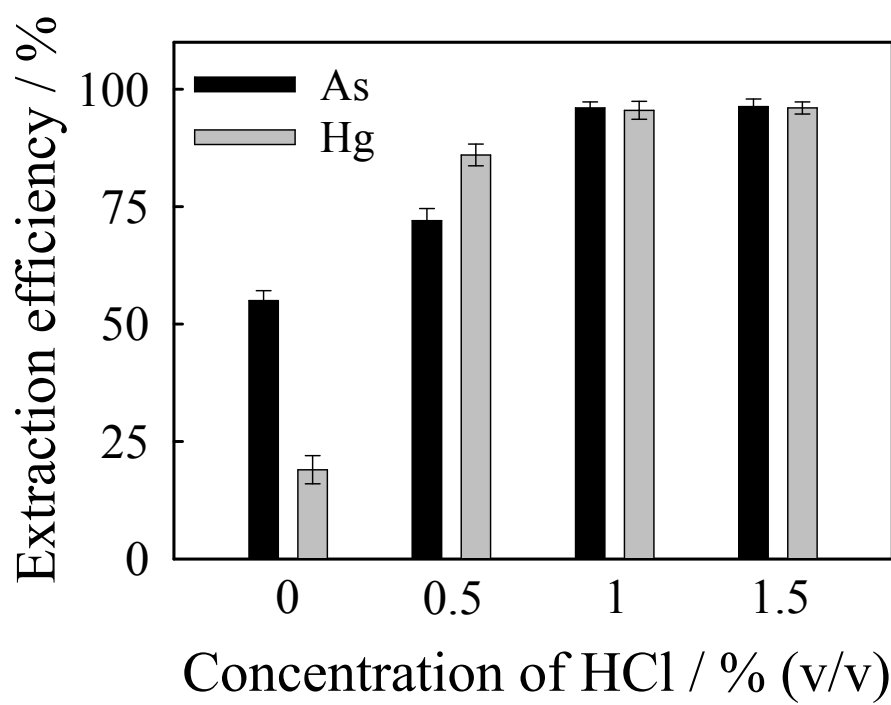

**Fig. S6** Effect of HCl concentration on extraction efficiency. The extraction solution contained 0.1% (m/v) Protease XIV and various concentration of HCl.
